# Supplementary material for: Provision of home mechanical ventilation and sleep services for England survey: Table 1
Source: HighWire-hosted journal article supplement (doi:10.1136/thoraxjnl-2013-203566), 2013-04-20
Supplement: thoraxjnl-2013-203566supp_figure.pdf [file thoraxjnl-2013-203566supp_figure.pdf]

We would be very grateful if you could complete this survey regarding sleep and ventilation service provision. It should only take 10 minutes. Thank you.

**\*1. Please state your institution.**

**\*2. Does your unit initiate patients with chronic hypercapnic respiratory failure on domiciliary non-invasive ventilation?**

- Yes  
 No

Other (please specify)

**\*3. Which of the following equipment for the assessment and diagnosis of sleep disordered breathing do you have access to in your unit?**

|                                             | Yes                      | No                       | Don't know               | Not applicable           |
|---------------------------------------------|--------------------------|--------------------------|--------------------------|--------------------------|
| Full polysomnography                        | <input type="checkbox"/> | <input type="checkbox"/> | <input type="checkbox"/> | <input type="checkbox"/> |
| Respiratory sleep study e.g Embletta, Alice | <input type="checkbox"/> | <input type="checkbox"/> | <input type="checkbox"/> | <input type="checkbox"/> |
| Overnight Oximetry                          | <input type="checkbox"/> | <input type="checkbox"/> | <input type="checkbox"/> | <input type="checkbox"/> |
| Transcutaneous capnography                  | <input type="checkbox"/> | <input type="checkbox"/> | <input type="checkbox"/> | <input type="checkbox"/> |
| CPAP autotitration                          | <input type="checkbox"/> | <input type="checkbox"/> | <input type="checkbox"/> | <input type="checkbox"/> |

Other (please specify)

**4. If you do not have access to all of the above, please state to whom patients are referred and which patient groups are referred.**

**\*5. Do you admit patients to perform the following?**

|                                      | Yes                      | No                       | Unsure                   | Not applicable           |
|--------------------------------------|--------------------------|--------------------------|--------------------------|--------------------------|
| Respiratory sleep study              | <input type="checkbox"/> | <input type="checkbox"/> | <input type="checkbox"/> | <input type="checkbox"/> |
| Overnight oximetry                   | <input type="checkbox"/> | <input type="checkbox"/> | <input type="checkbox"/> | <input type="checkbox"/> |
| Overnight transcutaneous capnography | <input type="checkbox"/> | <input type="checkbox"/> | <input type="checkbox"/> | <input type="checkbox"/> |
| CPAP autotitration                   | <input type="checkbox"/> | <input type="checkbox"/> | <input type="checkbox"/> | <input type="checkbox"/> |

Other (please specify)

**\*6. Who reports your monitoring/diagnostic studies?**

|                                      | Doctor                   | Nurse                    | Technician               | External company         | Not Applicable           |
|--------------------------------------|--------------------------|--------------------------|--------------------------|--------------------------|--------------------------|
| Full polysomnography                 | <input type="checkbox"/> |
| Respiratory sleep study              | <input type="checkbox"/> |
| Overnight oximetry                   | <input type="checkbox"/> |
| Overnight transcutaneous capnography | <input type="checkbox"/> |
| CPAP autotitration                   | <input type="checkbox"/> |

Other (please specify)

**7. Who advises patients regarding the following:**

|                        | Doctor                   | Nurse                    | HCA                      | Technician               | Ventilator provider      | Don't know               | Not applicable           |
|------------------------|--------------------------|--------------------------|--------------------------|--------------------------|--------------------------|--------------------------|--------------------------|
| Mask issues            | <input type="checkbox"/> |
| Ventilator faults      | <input type="checkbox"/> |
| Ventilator maintenance | <input type="checkbox"/> |

Other (please specify)

**\*8. Does your hospital specifically charge the PCT for the following services?**

|                                      | Yes                      | No                       | Unsure                   | Not applicable           |
|--------------------------------------|--------------------------|--------------------------|--------------------------|--------------------------|
| Fully polysomnography                | <input type="checkbox"/> | <input type="checkbox"/> | <input type="checkbox"/> | <input type="checkbox"/> |
| Respiratory sleep study              | <input type="checkbox"/> | <input type="checkbox"/> | <input type="checkbox"/> | <input type="checkbox"/> |
| Overnight oximetry                   | <input type="checkbox"/> | <input type="checkbox"/> | <input type="checkbox"/> | <input type="checkbox"/> |
| Overnight transcutaneous capnography | <input type="checkbox"/> | <input type="checkbox"/> | <input type="checkbox"/> | <input type="checkbox"/> |
| Domiciliary non-invasive ventilation | <input type="checkbox"/> | <input type="checkbox"/> | <input type="checkbox"/> | <input type="checkbox"/> |

Other (please specify)

**\*9. Please estimate the number of the following groups of patients initiated on domiciliary non-invasive ventilation per annum.**

|                                       |                      |
|---------------------------------------|----------------------|
| Obesity related respiratory failure   | <input type="text"/> |
| Chronic obstructive pulmonary disease | <input type="text"/> |
| Neuromuscular weakness                | <input type="text"/> |
| Restrictive chest wall defect         | <input type="text"/> |

**\*10. Please provide an estimate of what you feel is an appropriate level of concordance with nocturnal ventilation (hours per night) for each of the following patient groups.**

|                                       |                      |
|---------------------------------------|----------------------|
| Obesity related respiratory failure   | <input type="text"/> |
| Chronic obstructive pulmonary disease | <input type="text"/> |
| Neuromuscular weakness                | <input type="text"/> |
| Restrictive chest wall defect         | <input type="text"/> |
