# Supplementary material for: Provision of home mechanical ventilation and sleep services for England survey: Table 1
Source: HighWire-hosted journal article supplement (doi:10.1136/thoraxjnl-2013-203566), 2013-04-20
Supplement: thoraxjnl-2013-203566supp_table.pdf [file thoraxjnl-2013-203566supp_table.pdf]

|                   | Reporting |     |          |            |           | Troubleshooting measures |                   |                        |
|-------------------|-----------|-----|----------|------------|-----------|--------------------------|-------------------|------------------------|
|                   | PSG       | RP  | Oximetry | Capnometry | Auto-CPAP | Mask Issues              | Ventilator Faults | Ventilator Maintenance |
| <b>Doctor</b>     | 77%       | 79% | 78%      | 88%        | 41%       | 29%                      | 17%               | 9%                     |
| <b>Nurse</b>      | 0%        | 5%  | 8%       | 15%        | 25%       | 47%                      | 35%               | 27%                    |
| <b>Technician</b> | 85%       | 39% | 22%      | 21%        | 50%       | 55%                      | 51%               | 52%                    |
| <b>HCA</b>        | 0%        | 0%  | 0%       | 0%         | 0%        | 4%                       | 1%                | 3%                     |
| <b>Company</b>    | 0%        | 0%  | 0%       | 0%         | 0%        | 5%                       | 10%               | 12%                    |
| <b>Other</b>      | 0%        | 2%  | 0%       | 0%         | 3%        | 3%                       | 1%                | 0%                     |

*Table E1: Staff involved in reporting diagnostic studies managing clinical issues. All values are expressed as a %.*

*Abbreviations: HCA =Health Care Assistant PSG =Polysomnography ; RP = Respiratory Polygraphy  
CPAP = Continuous Positive Airway Pressure; Auto-CPAP = Auto Continuous Positive Airway Pressure*
